# Supplementary material
Source: Royal Society of Chemistry journal article supplement (doi:10.1039/d6nr00163g)
Supplement: d6nr00163g1.pdf [file d6nr00163g1.pdf]

**Enhancing multiphoton absorption in atomically precise (AuAg)<sub>13</sub> clusters via 2-  
/4-mercaptopyridine ligand positional isomerism**

Anqi Xu,<sup>‡,a</sup> Ye Wang,<sup>‡,a</sup> Daqiao Hu,<sup>a</sup> Shengli Li,<sup>\*,a</sup> Lin Xiong,<sup>\*,b</sup> Shan Jin,<sup>\*,c</sup> Qiong Zhang,<sup>a</sup> Manzhou  
Zhu<sup>a,c</sup>

- a. School of Chemistry and Chemical Engineering, Anhui University, Hefei 230601, China.  
b. School of Food and Chemical Engineering, Shaoyang University, Shaoyang 422000, P. R. China.  
c. Institutes of Physical Science and Information Technology, Key Laboratory of Structure and Functional Regulation of Hybrid Materials of Ministry of Education, Anhui University, Hefei 230601, China.

<sup>‡</sup> Anqi Xu and Ye Wang contributed equally to this work.

E-mail: jinshan@ahu.edu.cn; 96044@ahu.edu.cn; linxiong@hnsyu.edu.cn

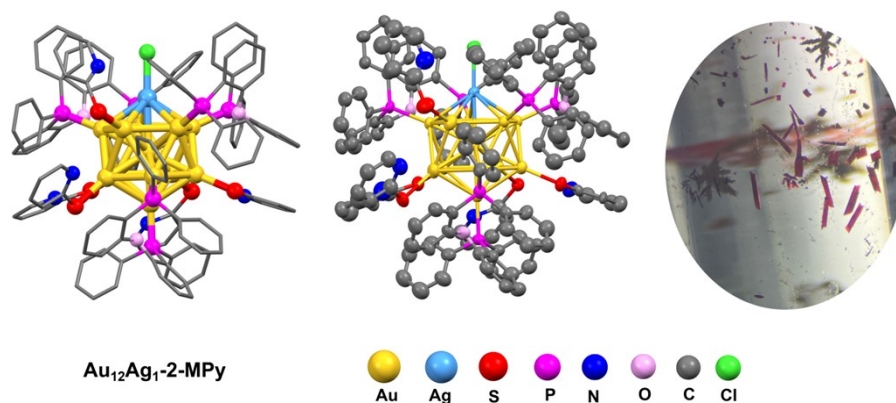

Figure S1. The overall structure of Au<sub>12</sub>Ag<sub>1</sub>-2-MPy and the corresponding crystal photographs.

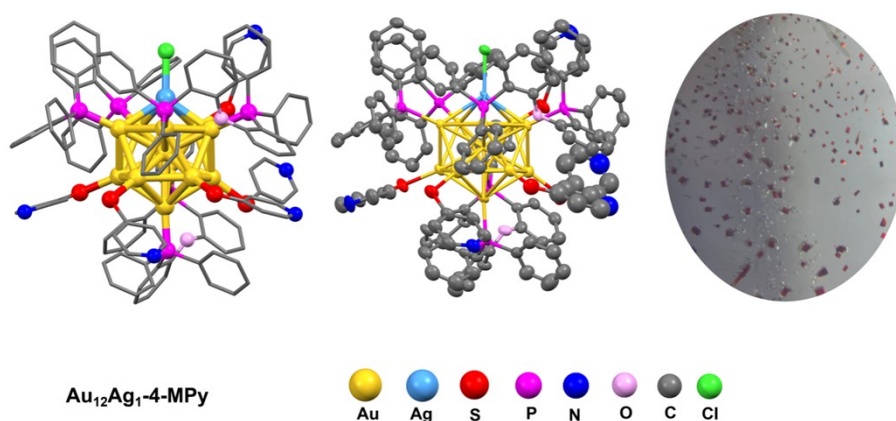

Figure S2. The overall structure of Au<sub>12</sub>Ag<sub>1</sub>-4-MPy and the corresponding crystal photographs.

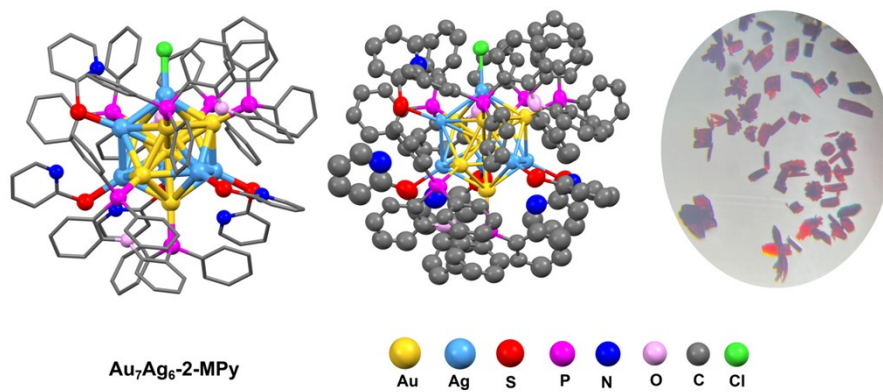

Figure S3. The overall structure of **Au<sub>7</sub>Ag<sub>6</sub>-2-MPy** and the corresponding crystal photographs.

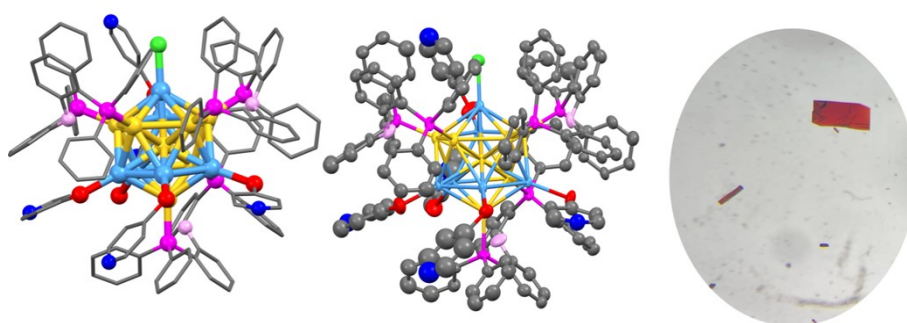

Figure S4. The overall structure of **Au<sub>7</sub>Ag<sub>6</sub>-4-MPy** and the corresponding crystal photographs.

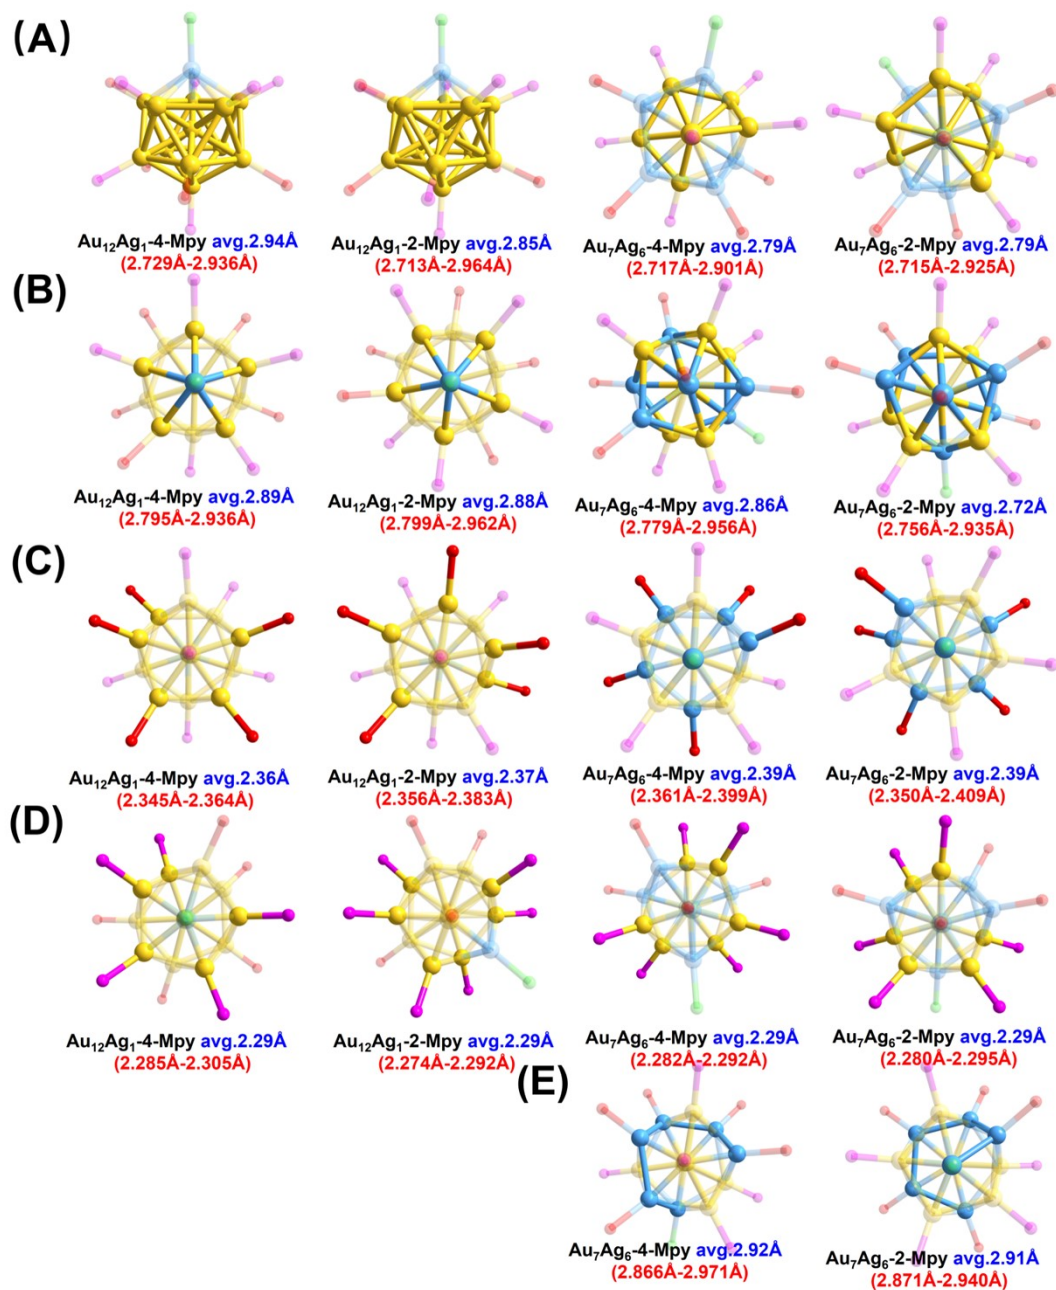

**Figure S5.** Comparison of the lengths of (A) Au-Au, (B) Au-Ag, (C) M(Au/Ag)-S, (D) Au-P, (E) Ag-Ag bonds of  $\text{Au}_{12}\text{Ag}_1\text{-4-MPy}$ ,  $\text{Au}_{12}\text{Ag}_1\text{-2-MPy}$ ,  $\text{Au}_7\text{Ag}_6\text{-4-MPy}$  and  $\text{Au}_7\text{Ag}_6\text{-2-MPy}$  nanoclusters. Color labels: light orange = Au; blue=Ag; pink = P; red = S. All H atoms were omitted for clarity.

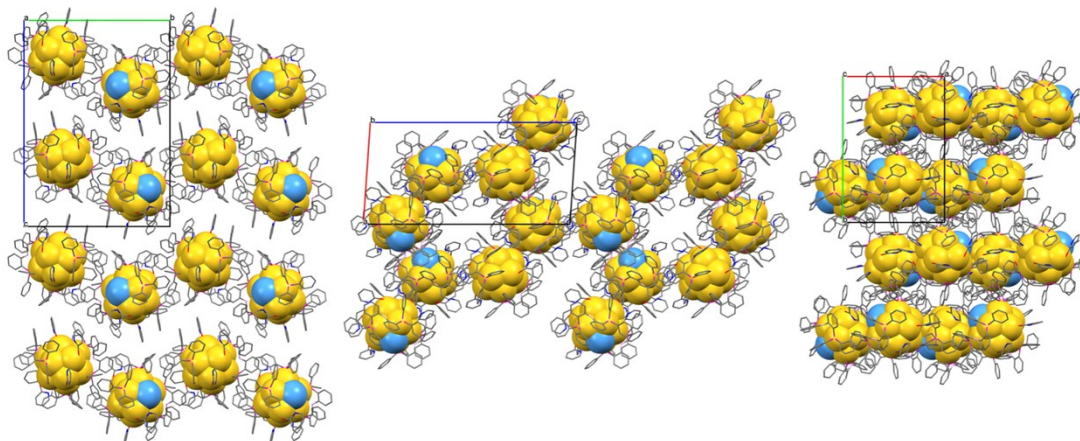

Figure S6. The packing of  $\text{Au}_{12}\text{Ag}_1\text{-2-MPy}$ .

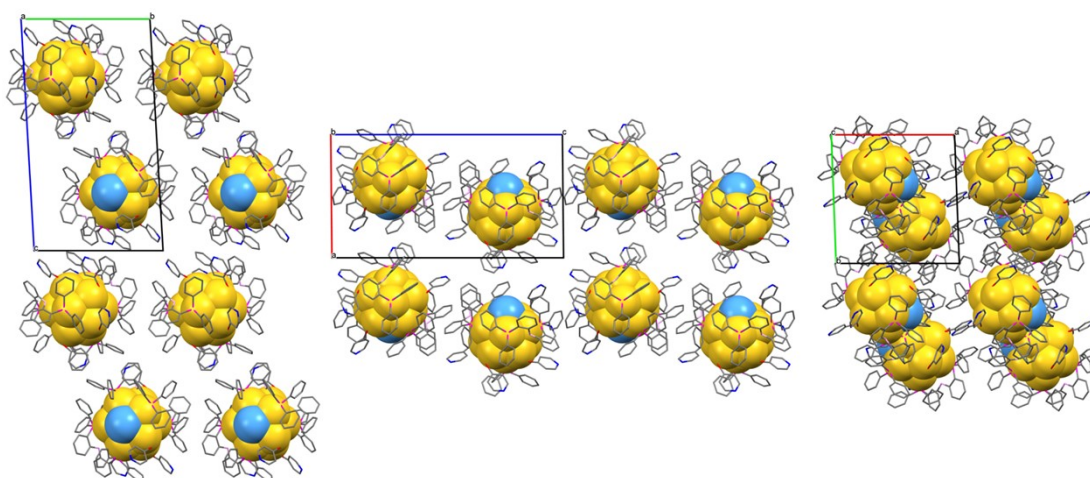

Figure S7. The packing of  $\text{Au}_{12}\text{Ag}_1\text{-4-MPy}$ .

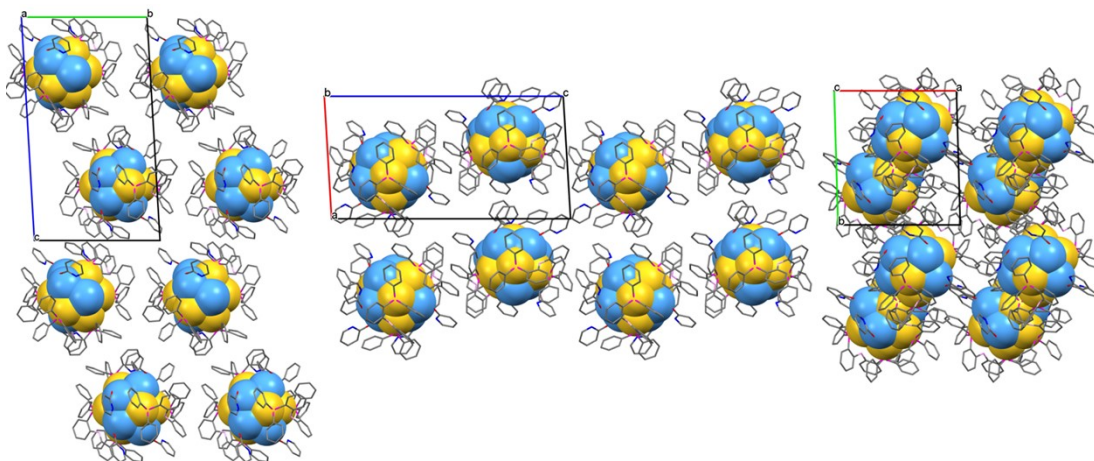

Figure S8. The packing of  $\text{Au}_7\text{Ag}_6\text{-2-MPy}$ .

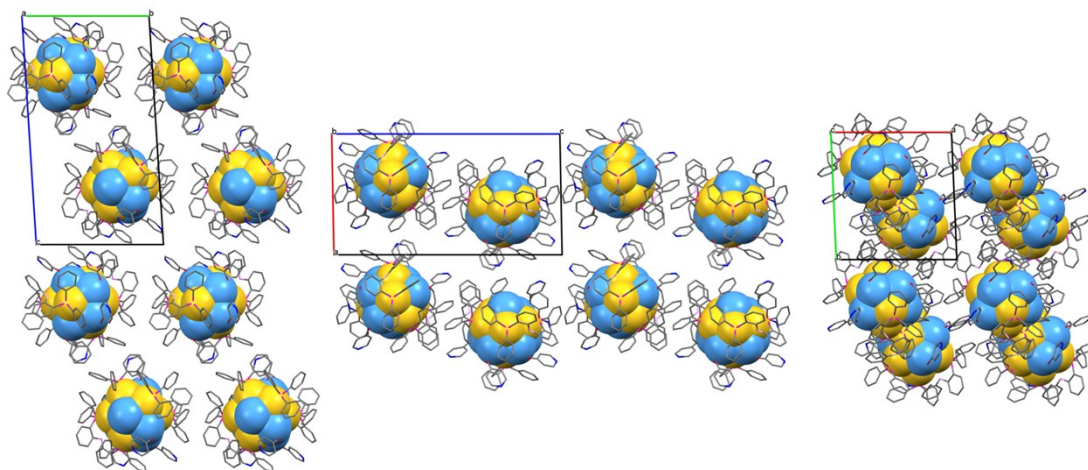

Figure S9. The packing of  $\text{Au}_7\text{Ag}_6\text{-4-MPy}$ .

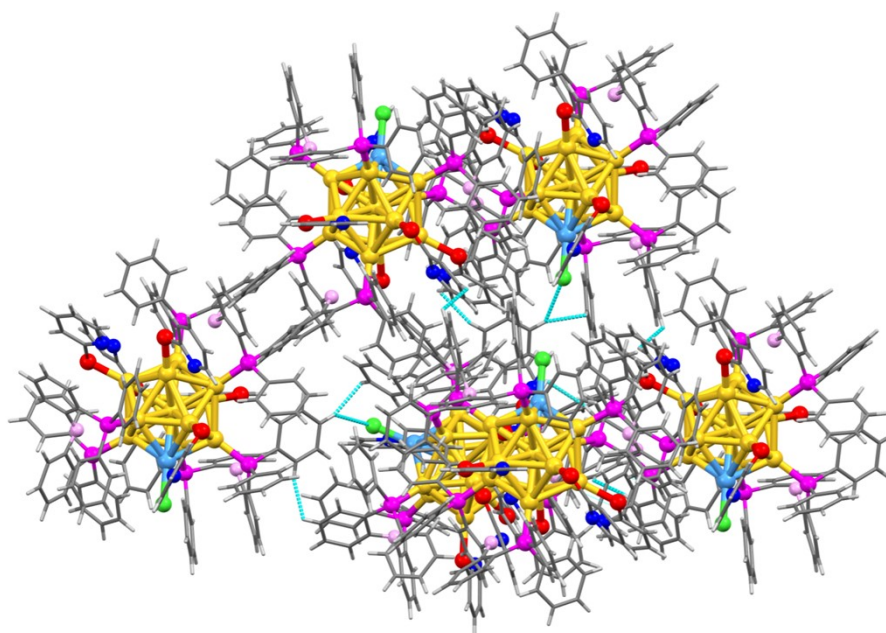

Figure S10. The intermolecular interactions in  $\text{Au}_{12}\text{Ag}_1\text{-2-MPy}$ .

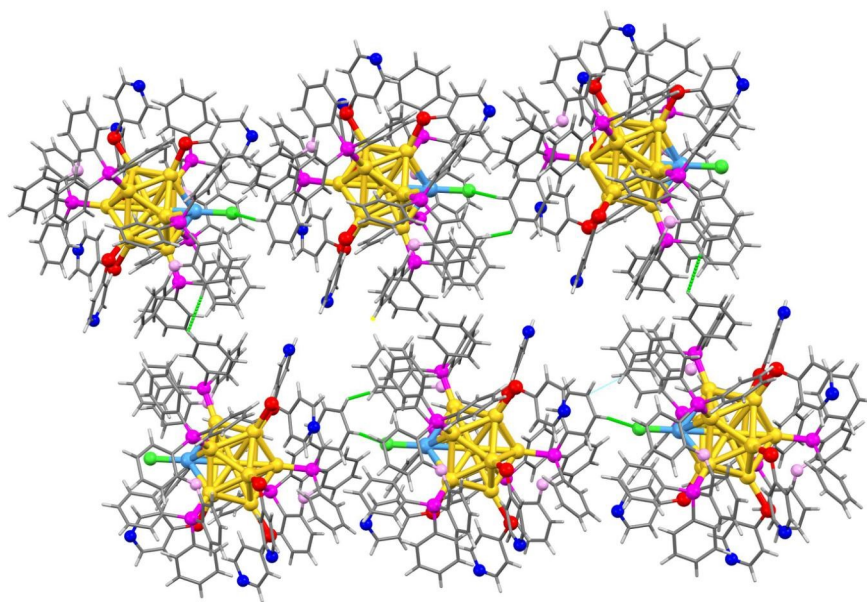

Figure S11. The intermolecular interactions in **Au<sub>12</sub>Ag<sub>1</sub>-4-MPy**.

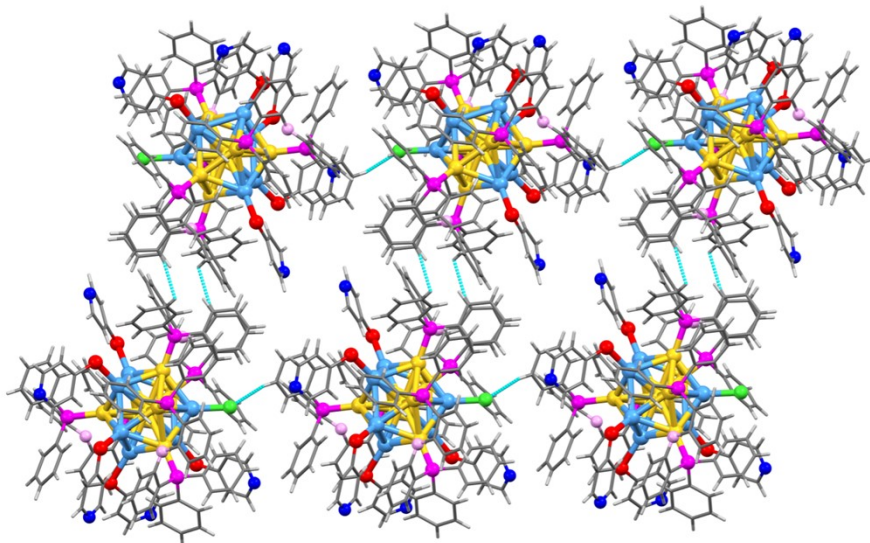

Figure S12. The intermolecular interactions in **Au<sub>7</sub>Ag<sub>6</sub>-4-MPy**.

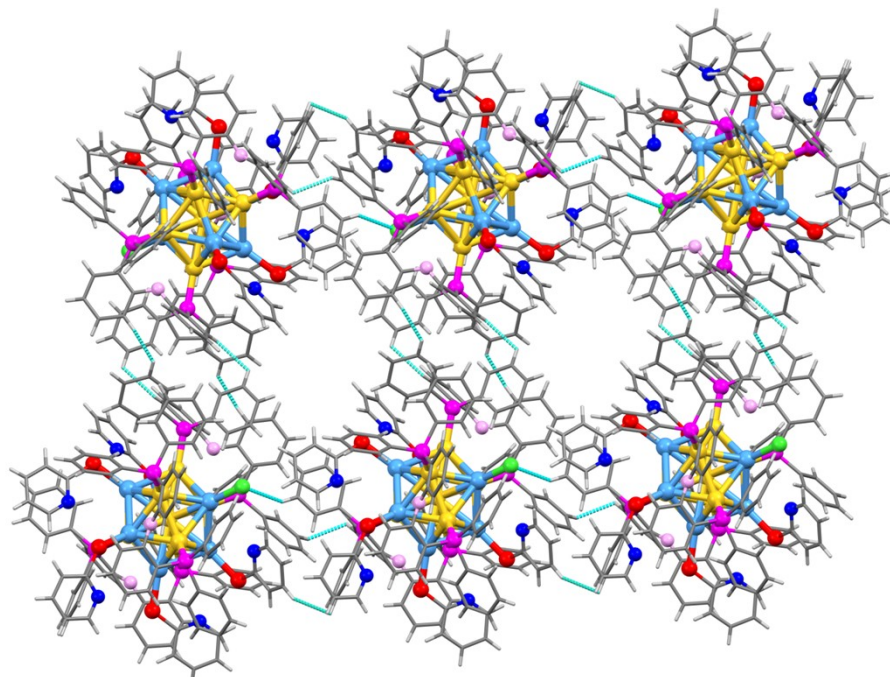

Figure S13. The intermolecular interactions in **Au<sub>7</sub>Ag<sub>6</sub>-2-MPy**.

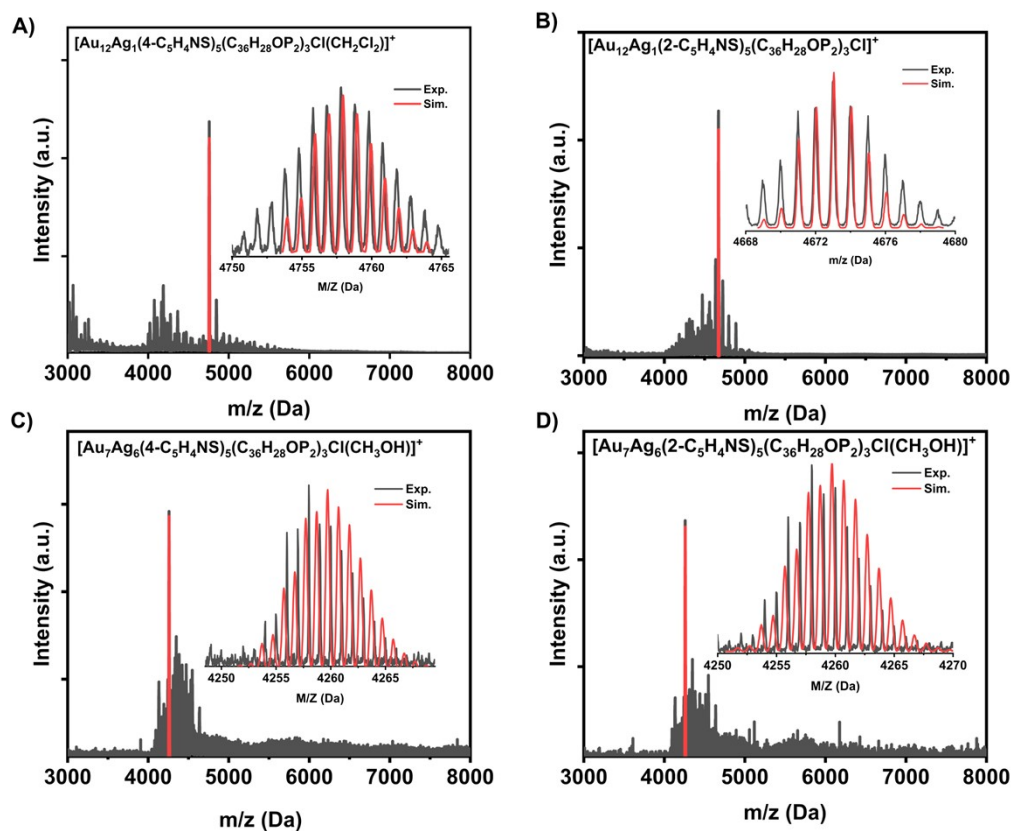

Figure S14. ESI-MS data of (A) **Au<sub>12</sub>Ag<sub>1</sub>-4-MPy**, (B) **Au<sub>12</sub>Ag<sub>1</sub>-2-MPy**, (C) **Au<sub>7</sub>Ag<sub>6</sub>-4-MPy** and (D) **Au<sub>7</sub>Ag<sub>6</sub>-2-MPy**.

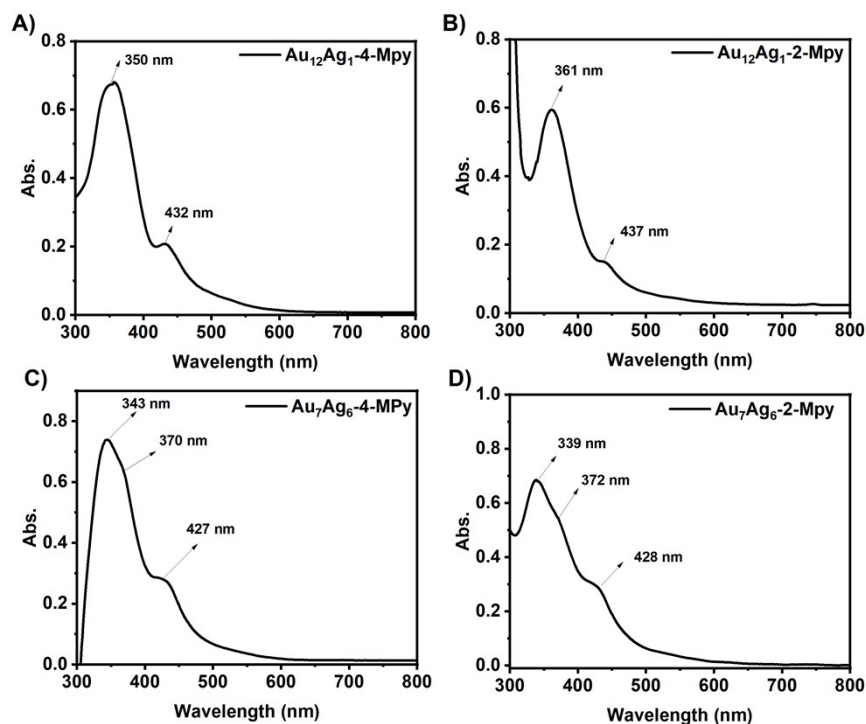

Figure S15. UV-vis spectra of (A)  $\text{Au}_{12}\text{Ag}_1\text{-4-MPy}$ , (B)  $\text{Au}_{12}\text{Ag}_1\text{-2-MPy}$ , (C)  $\text{Au}_7\text{Ag}_6\text{-4-MPy}$  and (D)  $\text{Au}_7\text{Ag}_6\text{-2-MPy}$  in DMSO solution.

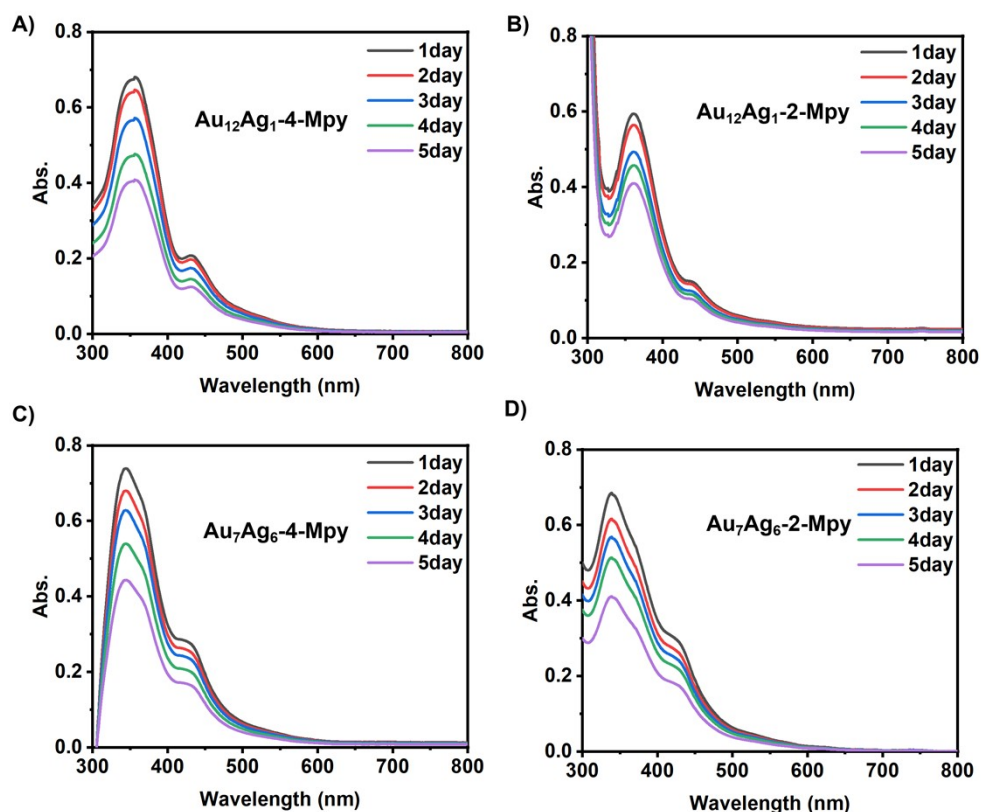

Figure S16. The UV-vis absorption spectra variation of (A)  $\text{Au}_{12}\text{Ag}_1\text{-4-MPy}$ , (B)  $\text{Au}_{12}\text{Ag}_1\text{-2-MPy}$ , (C)  $\text{Au}_7\text{Ag}_6\text{-4-MPy}$  and (D)  $\text{Au}_7\text{Ag}_6\text{-2-MPy}$  in DMSO solution. These nanoclusters show good stability in the ambient over 5 days.

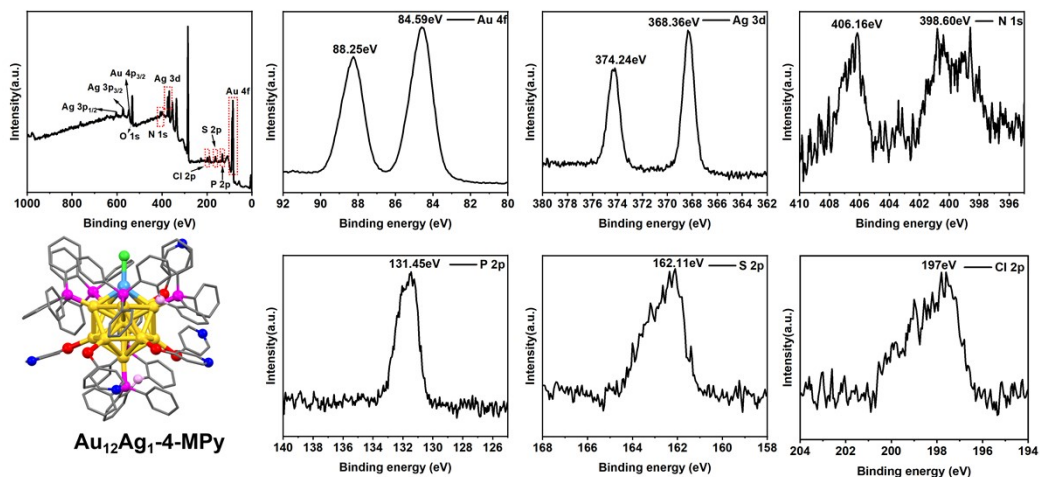

**Figure S17.** The XPS spectrum of Au<sub>12</sub>Ag<sub>1</sub>-4-MPy nanocluster.

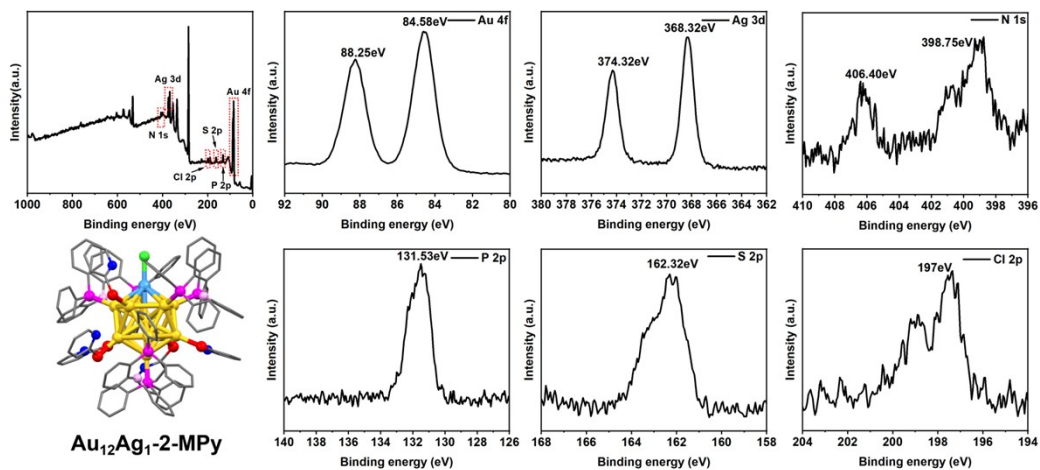

**Figure S18.** The XPS spectrum of Au<sub>12</sub>Ag<sub>1</sub>-2-MPy nanocluster.

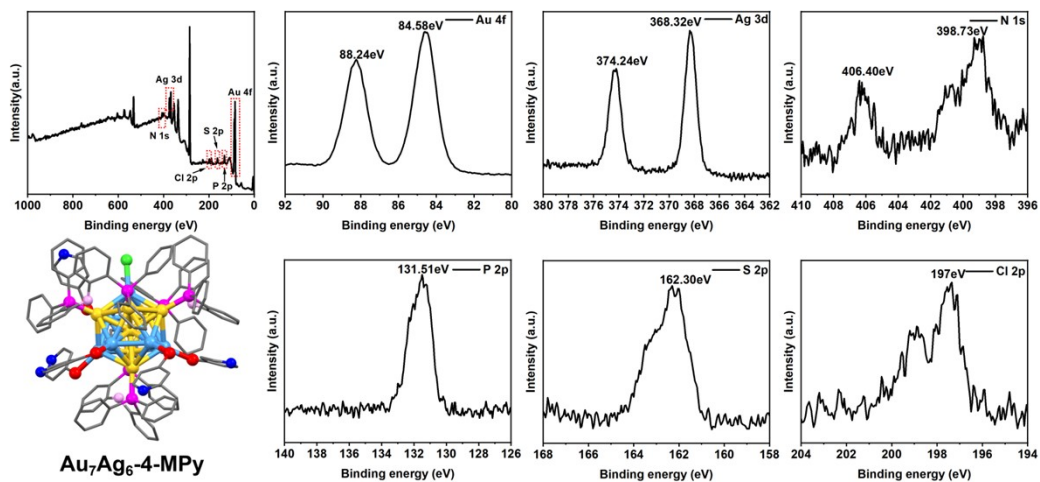

**Figure S19.** The XPS spectrum of Au<sub>7</sub>Ag<sub>6</sub>-4-MPy nanocluster.

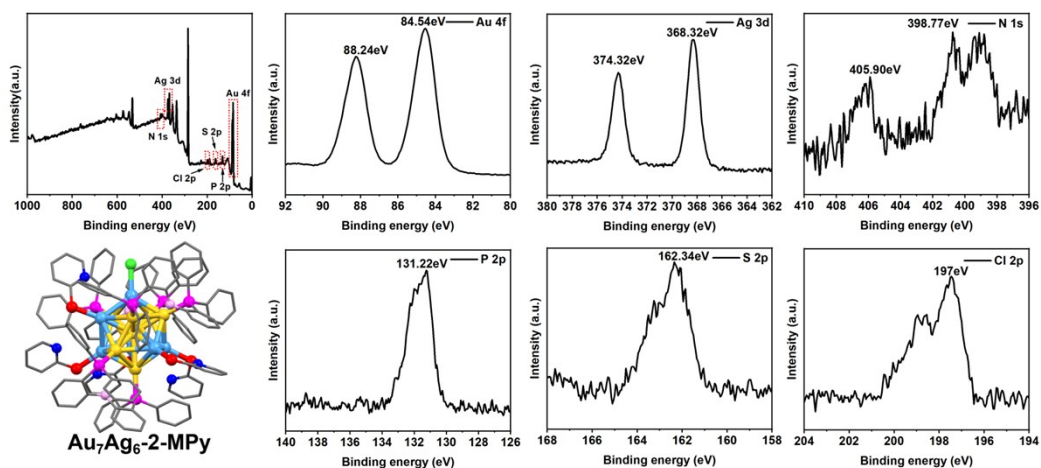

Figure S20. The XPS spectrum of  $\text{Au}_7\text{Ag}_6\text{-2-MPy}$  nanocluster.

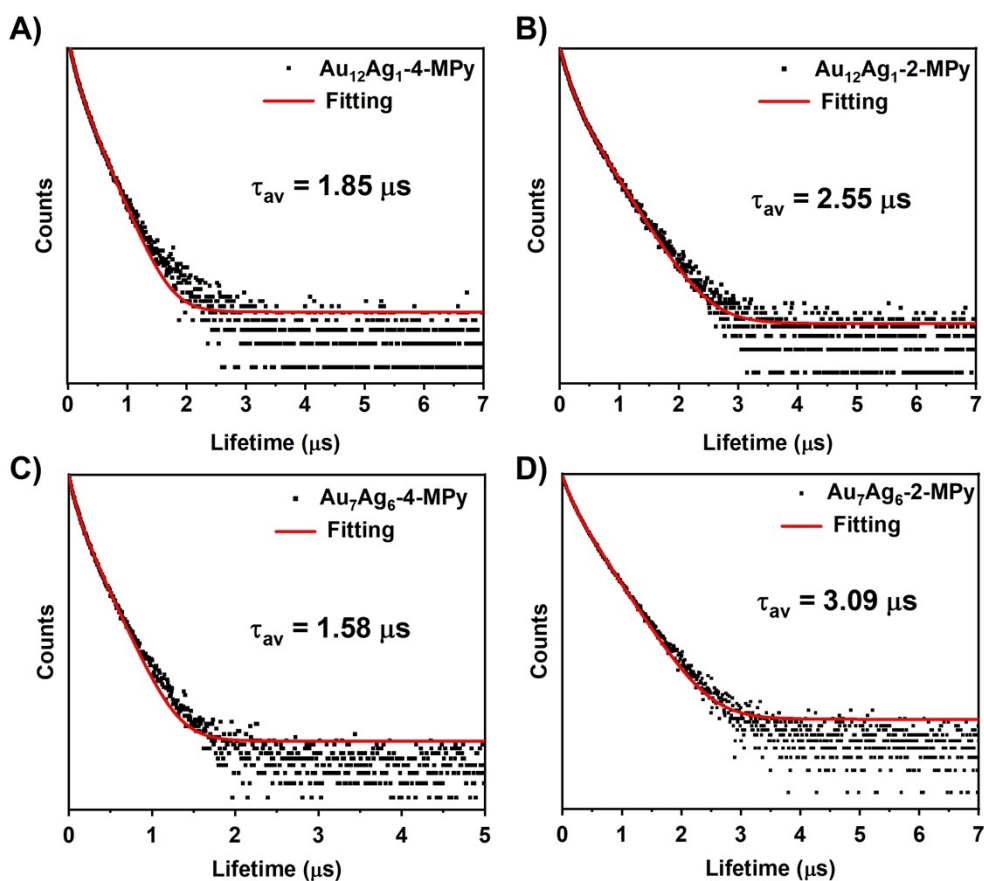

Figure S21. PL decay curves and fitting curves of (A)  $\text{Au}_{12}\text{Ag}_1\text{-4-MPy}$  and (B)  $\text{Au}_{12}\text{Ag}_1\text{-2-MPy}$  and (C)  $\text{Au}_7\text{Ag}_6\text{-4-MPy}$  and (D)  $\text{Au}_7\text{Ag}_6\text{-2-MPy}$ .

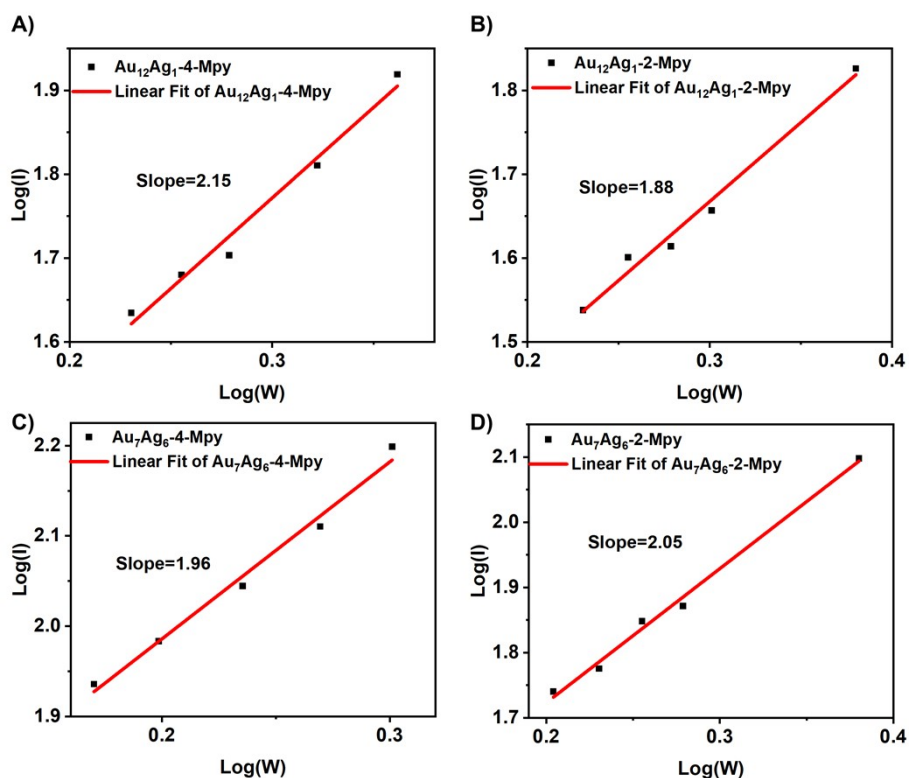

**Figure S22.** Two-photon fluorescence verification of (A) Au<sub>12</sub>Ag<sub>1</sub>-4-MPy and (B) Au<sub>12</sub>Ag<sub>1</sub>-2-MPy and (C) Au<sub>7</sub>Ag<sub>6</sub>-4-MPy and (D) Au<sub>7</sub>Ag<sub>6</sub>-2-MPy. (nanocluster concentration: 1 x 10<sup>-3</sup> mol/L; excitation wavelength: 820 nm).

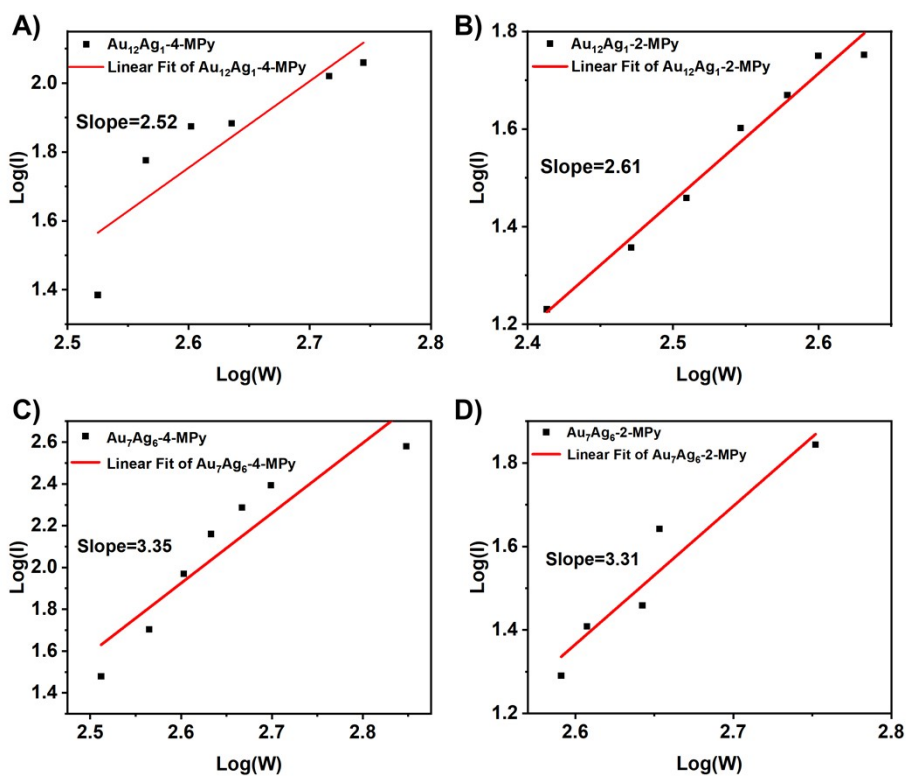

**Figure S23.** Three-photon fluorescence verification of (A) Au<sub>12</sub>Ag<sub>1</sub>-4-MPy and (B) Au<sub>12</sub>Ag<sub>1</sub>-2-MPy and (C) Au<sub>7</sub>Ag<sub>6</sub>-4-MPy and (D) Au<sub>7</sub>Ag<sub>6</sub>-2-MPy. ((nanocluster

concentration:  $1 \times 10^{-3}$  mol/L; excitation wavelength: 1200 nm).

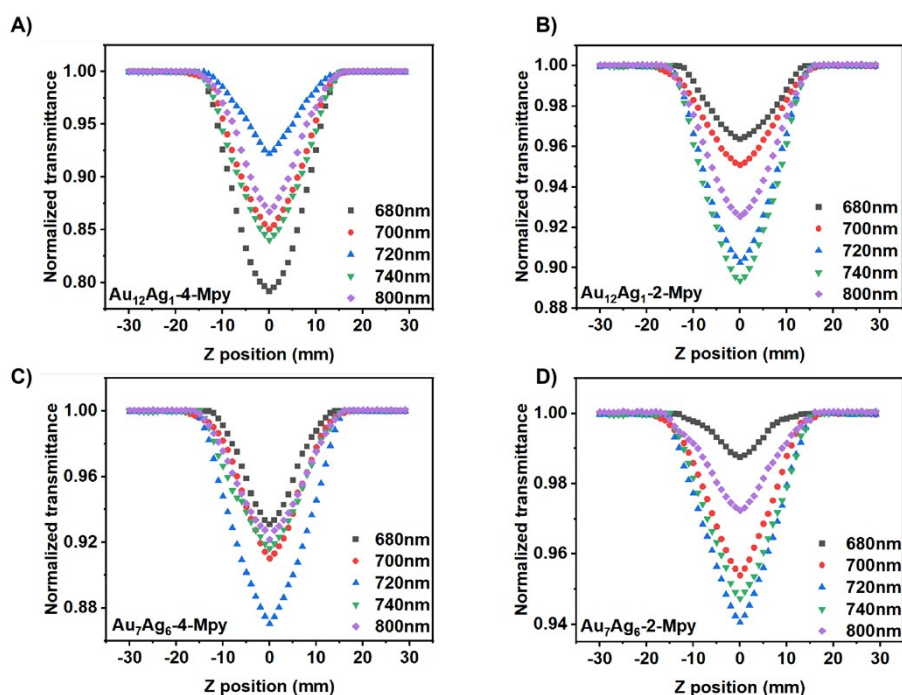

**Figure S24.** Two-photon absorption spectra of (A)  $\text{Au}_{12}\text{Ag}_1\text{-4-Mpy}$ , (B)  $\text{Au}_{12}\text{Ag}_1\text{-2-Mpy}$ , (C)  $\text{Au}_7\text{Ag}_6\text{-4-Mpy}$ , and (D)  $\text{Au}_7\text{Ag}_6\text{-2-Mpy}$  under excitation at 680-800 nm (nanocluster concentration:  $1 \times 10^{-3}$  mol/L).

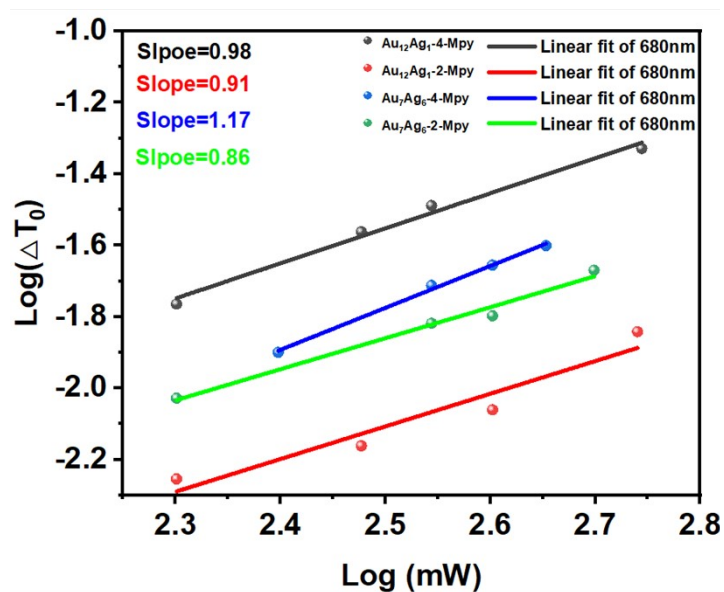

**Figure S25.** (A) Two photon absorption verification of  $\text{Au}_{12}\text{Ag}_1\text{-4-Mpy}$ , (B)  $\text{Au}_{12}\text{Ag}_1\text{-2-Mpy}$ , (C)  $\text{Au}_7\text{Ag}_6\text{-4-Mpy}$ , (D)  $\text{Au}_7\text{Ag}_6\text{-2-Mpy}$  under 680 nm excitation (nanocluster concentration:  $1 \times 10^{-3}$  mol/L).

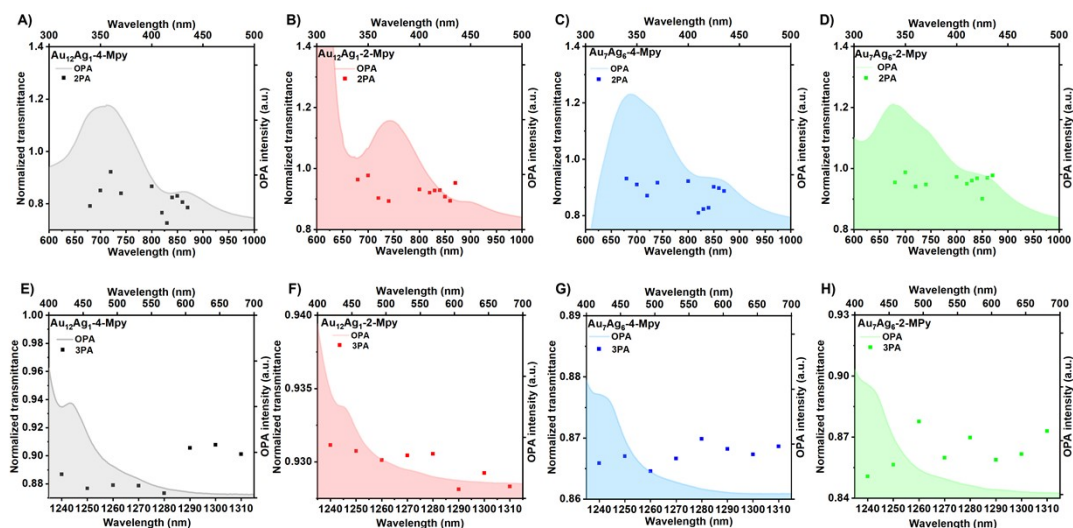

**Figure S26.** The correlation between wavelength-dependent two-photon absorption (left, lower axes) and single-photon absorption (OPA) spectra at twice the wavelength (right, upper axes) for (A) Au<sub>12</sub>Ag<sub>1</sub>-4-Mpy, (B) Au<sub>12</sub>Ag<sub>1</sub>-2-Mpy, (C) Au<sub>7</sub>Ag<sub>6</sub>-4-Mpy, (D) Au<sub>7</sub>Ag<sub>6</sub>-2-Mpy. The correlation between wavelength-dependent three-photon absorption (left, lower axes) and single-photon absorption (OPA) spectra at three times the wavelength (right, upper axes) for (E) Au<sub>12</sub>Ag<sub>1</sub>-4-Mpy, (F) Au<sub>12</sub>Ag<sub>1</sub>-2-Mpy, (G) Au<sub>7</sub>Ag<sub>6</sub>-4-Mpy, (H) Au<sub>7</sub>Ag<sub>6</sub>-2-Mpy.

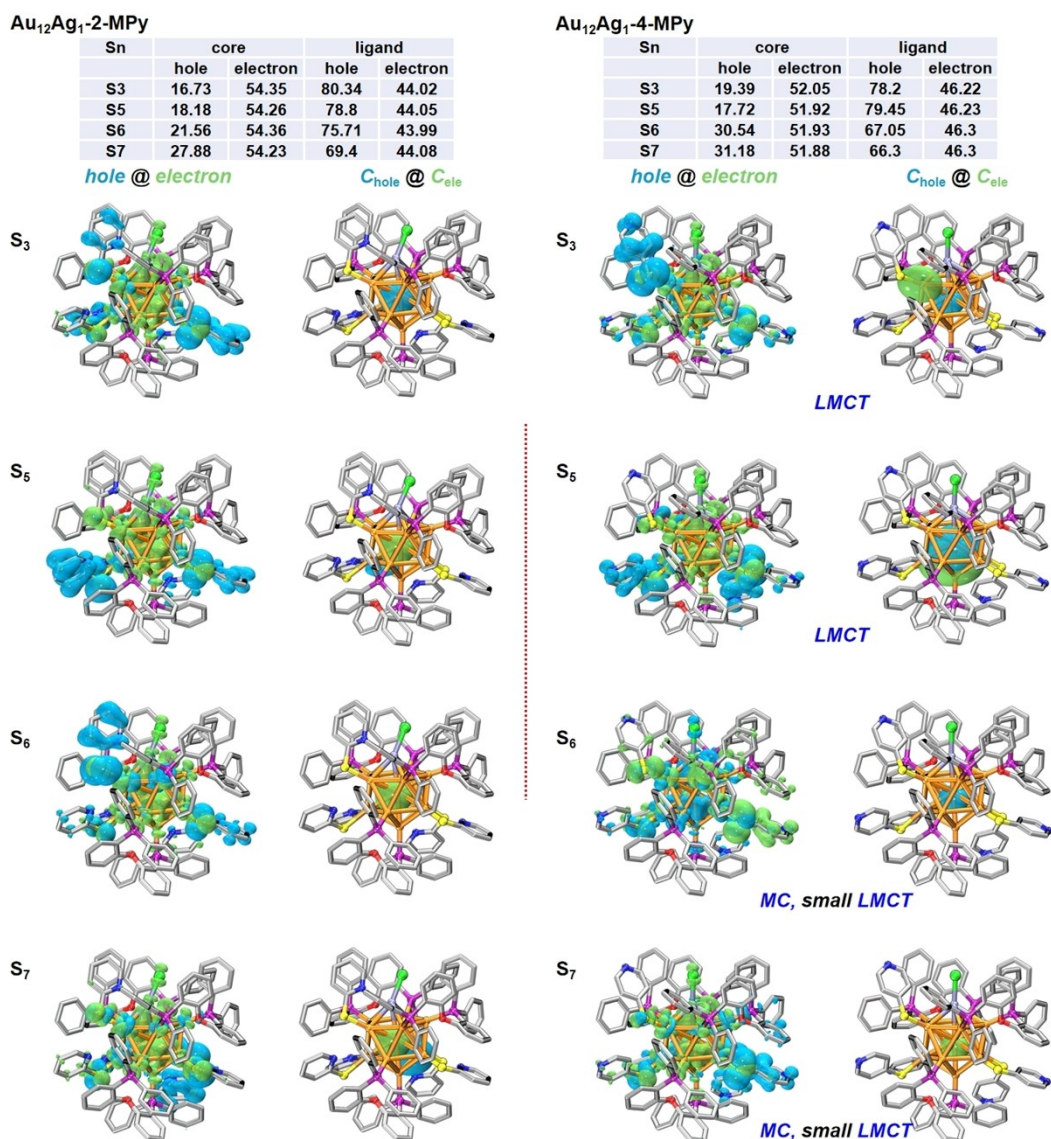

**Figure S27.** Hole and electron distributions of the S<sub>3</sub>-S<sub>7</sub> state of Au<sub>12</sub>Ag<sub>1</sub>.

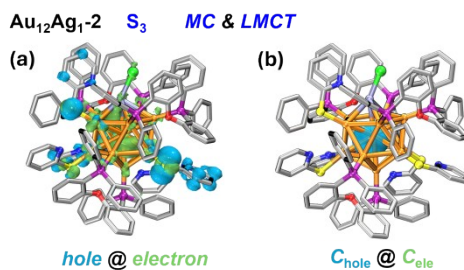

**Figure S28.** (a) Hole and electron distributions of the S<sub>3</sub> state of Au<sub>12</sub>Ag<sub>1</sub>-2-MPy including real-space distribution; (b) Smoothing of hole and electron isosurfaces.

**Table S1.** The quantum yield of nanoclusters.

| NC                                      | Liquid (%) | Solid (%) |
|-----------------------------------------|------------|-----------|
| Au <sub>12</sub> Ag <sub>1</sub> -4-Mpy | 1.76       | 11.86     |
| Au <sub>12</sub> Ag <sub>1</sub> -2-Mpy | 2.28       | 23.77     |
| Au <sub>7</sub> Ag <sub>6</sub> -4-Mpy  | 2.21       | 9.83      |
| Au <sub>7</sub> Ag <sub>6</sub> -2-Mpy  | 3.07       | 12.23     |

**Table S2.** Radiative and non-radiative parameters obtained from PL measurements (QY: quantum yield,  $\tau_{\text{avg}}$ : average lifetime,  $k_r$ : radiative decay rate,  $k_{\text{nr}}$ : non-radiative decay rate).

| NC                                      | QY (%) | $\tau_{\text{avg}}$ ( $\mu\text{s}$ ) | $K_r(\text{S}^{-1})$ | $K_{\text{nr}}(\text{S}^{-1})$ |
|-----------------------------------------|--------|---------------------------------------|----------------------|--------------------------------|
| Au <sub>12</sub> Ag <sub>1</sub> -4-Mpy | 1.76   | 1.85                                  | $9.5 \times 10^3$    | $5.31 \times 10^5$             |
| Au <sub>12</sub> Ag <sub>1</sub> -2-Mpy | 2.28   | 2.55                                  | $8.9 \times 10^3$    | $3.83 \times 10^5$             |
| Au <sub>7</sub> Ag <sub>6</sub> -4-Mpy  | 2.21   | 1.58                                  | $14 \times 10^3$     | $6.2 \times 10^5$              |
| Au <sub>7</sub> Ag <sub>6</sub> -2-Mpy  | 3.07   | 3.09                                  | $10 \times 10^3$     | $2.7 \times 10^4$              |

**Table S3.** Crystal data and structure refinement for Au<sub>12</sub>Ag<sub>1</sub>-2-MPy-OK.

|                                             |                                                                                                                    |
|---------------------------------------------|--------------------------------------------------------------------------------------------------------------------|
| Identification code                         | Au <sub>12</sub> Ag <sub>1</sub> -2-MPy-OK                                                                         |
| Empirical formula                           | C <sub>133</sub> H <sub>104</sub> AgAu <sub>12</sub> CIN <sub>5</sub> O <sub>3</sub> P <sub>6</sub> S <sub>5</sub> |
| Formula weight                              | 4673.24                                                                                                            |
| Temperature/K                               | 120(2)                                                                                                             |
| Crystal system                              | monoclinic                                                                                                         |
| Space group                                 | P2 <sub>1</sub> /n                                                                                                 |
| a/Å                                         | 17.195(2)                                                                                                          |
| b/Å                                         | 24.605(3)                                                                                                          |
| c/Å                                         | 34.833(4)                                                                                                          |
| $\alpha$ /°                                 | 90                                                                                                                 |
| $\beta$ /°                                  | 93.887(9)                                                                                                          |
| $\gamma$ /°                                 | 90                                                                                                                 |
| Volume/Å <sup>3</sup>                       | 14703(3)                                                                                                           |
| Z                                           | 4                                                                                                                  |
| Radiation                                   | CuK $\alpha$ ( $\lambda$ = 1.54186)                                                                                |
| 2 $\theta$ range for data collection/°      | 10.312 to 140.576                                                                                                  |
| Index ranges                                | -19 $\leq$ h $\leq$ 20, -11 $\leq$ k $\leq$ 29, -42 $\leq$ l $\leq$ 40                                             |
| Reflections collected                       | 110168                                                                                                             |
| Independent reflections                     | 27158 [ $R_{\text{int}}$ = 0.0707, $R_{\text{sigma}}$ = 0.0667]                                                    |
| Data/restraints/parameters                  | 27158/1160/1231                                                                                                    |
| Goodness-of-fit on F <sup>2</sup>           | 1.039                                                                                                              |
| Final R indexes [ $I \geq 2\sigma(I)$ ]     | $R_1$ = 0.0947, $wR_2$ = 0.2558                                                                                    |
| Final R indexes [all data]                  | $R_1$ = 0.1113, $wR_2$ = 0.2714                                                                                    |
| Largest diff. peak/hole / e Å <sup>-3</sup> | 4.17/-5.95                                                                                                         |

**Table S4.** Crystal data and structure refinement for Au<sub>12</sub>Ag<sub>1</sub>-4-MPy-OK.

|                                             |                                                                                                                    |
|---------------------------------------------|--------------------------------------------------------------------------------------------------------------------|
| Identification code                         | Au <sub>12</sub> Ag <sub>1</sub> -4-MPy-OK                                                                         |
| Empirical formula                           | C <sub>133</sub> H <sub>104</sub> AgAu <sub>12</sub> ClN <sub>5</sub> O <sub>3</sub> P <sub>6</sub> S <sub>5</sub> |
| Formula weight                              | 4673.24                                                                                                            |
| Temperature/K                               | 120(2)                                                                                                             |
| Crystal system                              | triclinic                                                                                                          |
| Space group                                 | P-1                                                                                                                |
| a/Å                                         | 15.999(3)                                                                                                          |
| b/Å                                         | 16.750(2)                                                                                                          |
| c/Å                                         | 30.139(4)                                                                                                          |
| α/°                                         | 86.732(12)                                                                                                         |
| β/°                                         | 89.337(14)                                                                                                         |
| γ/°                                         | 87.829(13)                                                                                                         |
| Volume/Å <sup>3</sup>                       | 8057(2)                                                                                                            |
| Z                                           | 4                                                                                                                  |
| Radiation                                   | CuKα (λ = 1.54186)                                                                                                 |
| 2θ range for data collection/°              | 8.128 to 124.996                                                                                                   |
| Index ranges                                | -18 ≤ h ≤ 18, -14 ≤ k ≤ 19, -34 ≤ l ≤ 34                                                                           |
| Reflections collected                       | 56629                                                                                                              |
| Independent reflections                     | 24737 [R <sub>int</sub> = 0.0419, R <sub>sigma</sub> = 0.0479]                                                     |
| Data/restraints/parameters                  | 24737/1336/1291                                                                                                    |
| Goodness-of-fit on F <sup>2</sup>           | 1.066                                                                                                              |
| Final R indexes [I ≥ 2σ (I)]                | R <sub>1</sub> = 0.0669, wR <sub>2</sub> = 0.1935                                                                  |
| Final R indexes [all data]                  | R <sub>1</sub> = 0.0768, wR <sub>2</sub> = 0.2014                                                                  |
| Largest diff. peak/hole / e Å <sup>-3</sup> | 3.41/-4.77                                                                                                         |

**Table S5.** Crystal data and structure refinement for Au<sub>7</sub>Ag<sub>6</sub>-2-MPy-OK.

|                                             |                                                                                                                                                  |
|---------------------------------------------|--------------------------------------------------------------------------------------------------------------------------------------------------|
| Identification code                         | Au7Ag6-2-MPy-OK                                                                                                                                  |
| Empirical formula                           | C <sub>133</sub> H <sub>104</sub> Ag <sub>6</sub> Au <sub>7</sub> Cl <sub>0.97</sub> N <sub>5</sub> O <sub>3</sub> P <sub>6</sub> S <sub>5</sub> |
| Formula weight                              | 4226.70                                                                                                                                          |
| Temperature/K                               | 120(2)                                                                                                                                           |
| Crystal system                              | triclinic                                                                                                                                        |
| Space group                                 | P-1                                                                                                                                              |
| a/Å                                         | 15.149(3)                                                                                                                                        |
| b/Å                                         | 16.597(3)                                                                                                                                        |
| c/Å                                         | 29.570(6)                                                                                                                                        |
| $\alpha$ /°                                 | 86.556(16)                                                                                                                                       |
| $\beta$ /°                                  | 86.473(16)                                                                                                                                       |
| $\gamma$ /°                                 | 88.139(16)                                                                                                                                       |
| Volume/Å <sup>3</sup>                       | 7404(3)                                                                                                                                          |
| Z                                           | 2                                                                                                                                                |
| Radiation                                   | CuK $\alpha$ ( $\lambda$ = 1.54186)                                                                                                              |
| 2 $\theta$ range for data collection/°      | 8.034 to 124.998                                                                                                                                 |
| Index ranges                                | -16 $\leq$ h $\leq$ 17, -15 $\leq$ k $\leq$ 19, -22 $\leq$ l $\leq$ 34                                                                           |
| Reflections collected                       | 41333                                                                                                                                            |
| Independent reflections                     | 22446 [ $R_{\text{int}}$ = 0.0906, $R_{\text{sigma}}$ = 0.0726]                                                                                  |
| Data/restraints/parameters                  | 22446/1813/1292                                                                                                                                  |
| Goodness-of-fit on F <sup>2</sup>           | 1.083                                                                                                                                            |
| Final R indexes [ $I \geq 2\sigma(I)$ ]     | $R_1$ = 0.1051, $wR_2$ = 0.2776                                                                                                                  |
| Final R indexes [all data]                  | $R_1$ = 0.1249, $wR_2$ = 0.2945                                                                                                                  |
| Largest diff. peak/hole / e Å <sup>-3</sup> | 3.64/-3.53                                                                                                                                       |

**Table S6.** Crystal data and structure refinement for Au<sub>7</sub>Ag<sub>6</sub>-4-MPy-OK.

|                                             |                                                                                                                                    |
|---------------------------------------------|------------------------------------------------------------------------------------------------------------------------------------|
| Identification code                         | Au <sub>7</sub> Ag <sub>6</sub> -4-MPy-OK                                                                                          |
| Empirical formula                           | C <sub>133</sub> H <sub>104</sub> Ag <sub>6</sub> Au <sub>6.39</sub> ClN <sub>5</sub> O <sub>3</sub> P <sub>6</sub> S <sub>5</sub> |
| Formula weight                              | 4107.61                                                                                                                            |
| Temperature/K                               | 120(2)                                                                                                                             |
| Crystal system                              | triclinic                                                                                                                          |
| Space group                                 | P-1                                                                                                                                |
| a/Å                                         | 15.832(3)                                                                                                                          |
| b/Å                                         | 16.707(3)                                                                                                                          |
| c/Å                                         | 29.996(5)                                                                                                                          |
| α/°                                         | 86.323(15)                                                                                                                         |
| β/°                                         | 88.797(14)                                                                                                                         |
| γ/°                                         | 87.481(15)                                                                                                                         |
| Volume/Å <sup>3</sup>                       | 7909(2)                                                                                                                            |
| Z                                           | 2                                                                                                                                  |
| Radiation                                   | CuKα (λ = 1.54186)                                                                                                                 |
| 2θ range for data collection/°              | 6.234 to 129.998                                                                                                                   |
| Index ranges                                | -13 ≤ h ≤ 18, -19 ≤ k ≤ 19, -35 ≤ l ≤ 27                                                                                           |
| Reflections collected                       | 65619                                                                                                                              |
| Independent reflections                     | 26304 [R <sub>int</sub> = 0.1161, R <sub>sigma</sub> = 0.1076]                                                                     |
| Data/restraints/parameters                  | 26304/1209/1280                                                                                                                    |
| Goodness-of-fit on F <sup>2</sup>           | 1.483                                                                                                                              |
| Final R indexes [I ≥ 2σ (I)]                | R <sub>1</sub> = 0.1469, wR <sub>2</sub> = 0.3603                                                                                  |
| Final R indexes [all data]                  | R <sub>1</sub> = 0.1731, wR <sub>2</sub> = 0.3795                                                                                  |
| Largest diff. peak/hole / e Å <sup>-3</sup> | 7.37/-8.38                                                                                                                         |

Table S7. Two Photon Absorption Cross Sections of Au<sub>12</sub>Ag<sub>1</sub>-4-Mpy, Au<sub>12</sub>Ag<sub>1</sub>-2-Mpy, Au<sub>7</sub>Ag<sub>6</sub>-4-Mpy, and Au<sub>7</sub>Ag<sub>6</sub>-2-Mpy.

| $\sigma_2$ (GM)<br>$\lambda$ (nm) | Au <sub>12</sub> Ag <sub>1</sub> -4-Mpy | Au <sub>12</sub> Ag <sub>1</sub> -2-Mpy | Au <sub>7</sub> Ag <sub>6</sub> -4-Mpy | Au <sub>7</sub> Ag <sub>6</sub> -2-Mpy |
|-----------------------------------|-----------------------------------------|-----------------------------------------|----------------------------------------|----------------------------------------|
| 680                               | 3688.62                                 | 1339.56                                 | 2522.5                                 | 805.26                                 |
| 700                               | 2584.17                                 | 388.78                                  | 1636.03                                | 402.53                                 |
| 720                               | 916.76                                  | 1178.04                                 | 1017.61                                | 718.74                                 |
| 740                               | 1578.74                                 | 1073.06                                 | 867.45                                 | 536.98                                 |
| 800                               | 1439.78                                 | 569.31                                  | 666.25                                 | 550.75                                 |
| 820                               | 6290.93                                 | 1931.91                                 | 4468.79                                | 1207.44                                |
| 830                               | 5755.49                                 | 1797.3                                  | 4334.19                                | 994.08                                 |
| 840                               | 4400.46                                 | 1728.75                                 | 4234.31                                | 809.37                                 |
| 850                               | 4609.87                                 | 1824.9                                  | 2368.49                                | 1109.51                                |
| 860                               | 5142.4                                  | 2193.66                                 | 2609.58                                | 775.2                                  |
| 870                               | 5576.45                                 | 1100.11                                 | 2921                                   | 606.96                                 |

The maximum two-photon absorption cross-section of Au<sub>12</sub>Ag<sub>1</sub>-4-Mpy at 820 nm is 6290.93 GM;

The maximum two-photon absorption cross-section of Au<sub>12</sub>Ag<sub>1</sub>-2-Mpy at 860 nm is 2193.66 GM;

The maximum two-photon absorption cross-section of Au<sub>7</sub>Ag<sub>6</sub>-4-Mpy at 820 nm is 4468.79 GM;

The maximum two-photon absorption cross-section of Au<sub>7</sub>Ag<sub>6</sub>-2-Mpy at 820 nm is 1207.44 GM;

Table S8. Three Photon Absorption Cross Sections of Au<sub>12</sub>Ag<sub>1</sub>-4-Mpy, Au<sub>12</sub>Ag<sub>1</sub>-2-Mpy, Au<sub>7</sub>Ag<sub>6</sub>-4-Mpy, and Au<sub>7</sub>Ag<sub>6</sub>-2-Mpy.

| $\sigma_3$ ( $10^{-73}$ cm <sup>6</sup> s <sup>2</sup> photon <sup>-2</sup> ) | Au <sub>12</sub> Ag <sub>1</sub> -4-Mpy | Au <sub>12</sub> Ag <sub>1</sub> -2-Mpy | Au <sub>7</sub> Ag <sub>6</sub> -4-Mpy | Au <sub>7</sub> Ag <sub>6</sub> -2-Mpy |
|-------------------------------------------------------------------------------|-----------------------------------------|-----------------------------------------|----------------------------------------|----------------------------------------|
| 1240                                                                          | 0.965                                   | 1.754                                   | 1.692                                  | 1.600                                  |
| 1250                                                                          | 0.967                                   | 1.726                                   | 1.664                                  | 1.512                                  |
| 1260                                                                          | 0.970                                   | 1.714                                   | 1.645                                  | 1.417                                  |
| 1270                                                                          | 0.962                                   | 1.711                                   | 1.634                                  | 1.592                                  |
| 1280                                                                          | 0.946                                   | 1.682                                   | 1.628                                  | 1.523                                  |
| 1290                                                                          | 0.885                                   | 1.795                                   | 1.614                                  | 1.538                                  |
| 1300                                                                          | 0.864                                   | 1.018                                   | 1.609                                  | 1.529                                  |
| 1310                                                                          | 0.898                                   | 2.031                                   | 1.608                                  | 1.541                                  |

The maximum three-photon absorption cross-section of Au<sub>12</sub>Ag<sub>1</sub>-4-Mpy at 1260 nm is  $0.97 \times 10^{-73}$  cm<sup>6</sup>s<sup>2</sup>photon<sup>-2</sup>;

The maximum three-photon absorption cross-section of Au<sub>12</sub>Ag<sub>1</sub>-2-Mpy at 1310 nm is  $2 \times 10^{-73}$  cm<sup>6</sup>s<sup>2</sup>photon<sup>-2</sup>;

The maximum three-photon absorption cross-section of Au<sub>7</sub>Ag<sub>6</sub>-4-Mpy at 1240 nm is  $1.69 \times 10^{-73}$  cm<sup>6</sup>s<sup>2</sup>photon<sup>-2</sup>;

The maximum three-photon absorption cross-section of Au<sub>7</sub>Ag<sub>6</sub>-2-Mpy at 1240 nm is  $1.6 \times 10^{-73}$  cm<sup>6</sup>s<sup>2</sup>photon<sup>-2</sup>;
